# Supplementary material for: A Community Detection Approach to Cleaning Extremely Large Face Database
Source: Comput Intell Neurosci. 2018 Apr 22;2018:4512473. doi: 10.1155/2018/4512473 (PMC5937595; doi:10.1155/2018/4512473)
Supplement: Supplementary Materials — This includes the final database cleaning result in our paper: the C-MS-Celeb dataset. The file list of the C-MS-Celeb includes the two TXT files in clean_list.7z: “clean_list_128Vec_WT051_P010.txt” and “relabel_list_128Vec_T058.” “clean_list_128Vec_WT051_P010.txt” contains the path of all cleaning results in Stage 2. “relabel_list_128Vec_T058.txt” contains the path of all relabeling results in Stage 3. For both files, the first column is the identity label of the image and the second column is the path of the image file. In order to use this largest clean dataset, one needs firstly to download the MS-Celeb-1M dataset and then copy the images according to the path in both TXT files. The raw MS-Celeb-1M dataset can be downloaded from the following website: https://www.microsoft.com/en-us/research/project/ms-celeb-1m-challenge-recognizing-one-million-celebrities-real-world/. [file 4512473.f1.zip]

Archive with 1 entries (0 files):
- 4512473.f1/
